# Supplementary material for: XX Disorder of Sex Development is associated with an insertion on chromosome 9 and downregulation of RSPO1 in dogs (Canis lupus familiaris)
Source: PLOS journal article supplement (doi:10.1371/journal.pone.0186331), 2017-10-20
Supplement: S4 (10.1371/journal.pone.0186331.s004) [file journal.pone.0186331.s004]

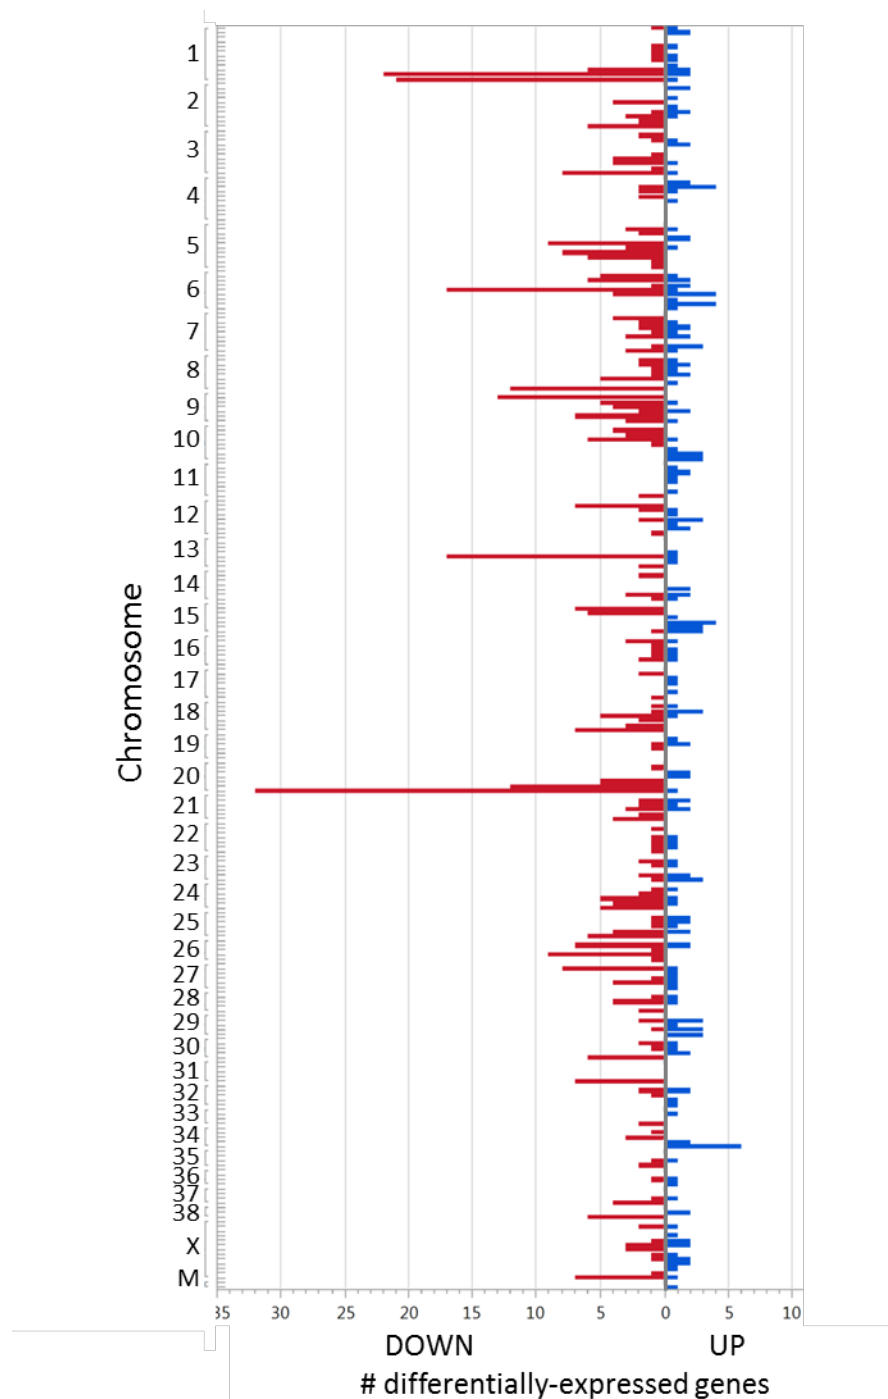

**Distribution of 754 stringent-DE genes across 10Mb intervals of the CanFam3 genome.**

The majority of these differentially-expressed genes have lower expression in the XX DSD cohort (red bars; 539=71%). Genomic intervals of 10Kb with at least 10 downregulated genes include Chr1: 100-110Mb (22 genes) and 110-120Mb (21 genes), Chr6: 30-40Mb (17 genes), Chr8:60-73Mb (12 genes), Chr9: 0-10Mb (13 genes; this region includes the GWAS and WGS intervals), Chr13: 30-40Mb (17 genes), Chr20:40-50Mb (12 genes) and 50-60Mb (32 genes).
